# Supplementary material for: Challenges and best practices for digital unstructured data enrichment in health research: A systematic narrative review
Source: PLOS Digit Health. 2023 Oct 11;2(10):e0000347. doi: 10.1371/journal.pdig.0000347 (PMC10566734; doi:10.1371/journal.pdig.0000347)
Supplement: S1 Data — (XLSX) [file pdig.0000347.s005.xlsx]

## Sheet: Sheet1
Title	Authors	Journal/Book	Publication Year	DOI	1. Medical Field	1. Medical subfield (e.g. neurology; Parkison's).	2. Type(s) of unstructured or structured data combined	3. Mentioned requirement or motivation for combining unstructured data (or structured data with unstructured data).	4. Knowledge enrichment(s) achieved by integrating unstructured data (or structured data with unstructured data).	5. Limitations presented by working with unstructured data.	6. Barriers or challenges with integrating unstructured data (or structured data with unstructured data).	7. Proposed solutions for better integration of unstructured data (or structured data with unstructured data).
CardioNet: a manually curated database for artificial intelligence-based research on cardiovascular diseases	Ahn I, Na W, Kwon O, Yang DH, Park GM, Gwon H, Kang HJ, Jeong YU, Yoo J, Kim Y, Jun TJ, Kim YH.	BMC Med Inform Decis Mak	2021	10.1186/s12911-021-01392-2	Cardiology	Cardiology, patients with ICD codes related to cardiovascular disorders who had undergone imaging diagnostics	Str: from the EHR - demographics, vital signs, medication, laboratory test results, patient history questionnaire, Unstr: text readings of ECG, coronary artery CT, holter data, Thalium SPECT	Performance of AI models using str. data is not as good as when using imaging data. However, there is often a lot of important information in the free text readings of the imaging, which cannot be put in an AI model as simply as images can. The authors wanted to advance AI models using str. data with the addition of the processed free text readings.	CardioNet (the platform they were making with the ehr data) can contribute to the early prediction of cardiac problems and promote further CVD-related research.	Unstructured text data cannot be used raw to train AI, it requires a lot of preprocesing.	English in free-text readings differs between clinicians, hospitals, and countries, unlike the English used in scientific communication within research articles. In different countries, these readings can be mixtures of the official national language and English.	AI training requires support from clinicians who can understand the meaning of the free text imaging readings in order to overcome differences between clinics, doctors, language usage etc.
Cardiovascular Informatics: building a bridge to data harmony	Andy AU, Guntuku SC, Adusumalli S, Asch DA, Groeneveld PW, Ungar LH, Merchant RM.	JMIR Cardio	2021	10.2196/24473	Cardiology	Cardiology, atherosclerotic cardiovascular disease	Facebook status updates and medical record data	Incorporating data from digital sources has the potential to enhance our approach for characterizing individuals’ risk and tailoring management, as a new type of precision medicine.	these findings suggest that such data can potentially provide supplemental information about an individual’s lifestyle and behavior, which can complement our understanding of contributors to long-term CV risk. Specific information in posts could help to guide clinicians in better understanding lifestyles and behaviors, and in counseling patients about heart disease risk.	Our analysis used posts from patients with at least 200 words in their Facebook posts, and therefore we cannot extrapolate about those who used social media less or did not consent to share; we used 200 words because prior work on using social media for predicting individuals’ traits determined that for good and stable predictive performance when working with social media data, data from users wi…
Metadata Concepts for Advancing the Use of Digital Health Technologies in Clinical Research	Badawy R, Hameed F, Bataille L, Little MA, Claes K, Saria S, Cedarbaum JM, Stephenson D, Neville J, Maetzler W, Espay AJ, Bloem BR, Simuni T, Karlin DR.	Digit Biomark	2019	10.1159/000502951	Neurology	Neurology; Parkinson’s diseases	Data from Digital health technologies (smartphones, smartwatches, and other body-worn sensors) & metadata the metadata would need to describe four important aspects of any study: (a) person, (b) context of collection, (c) observations, and (d) time. (p.120) + Figure 1 p.121 The proposed metadata concepts comprise the following: (1) Person: includes relevant metadata pertaining to the individuals …	Same as barrier a): Despite the promising application of digital health technologies in research, their usage has been limited in practice due to lack of regulatory guidance [21] on what evidence should be available when validating the precision and reliability of the collected data. These data can be large in size, difficult to manage, and potentially meaningless without appropriate processing a…		[Digital health technologies (smartphones, smartwatches, and other body-worn sensors)] have yet to widely demonstrate value in clinical research due to insufficient data interpretability and lack of regulatory acceptance. (Abstract p.116) Potential limitations and their solution are highlighted on p.119-120	a) Despite the promising application of digital health technologies in research, their usage has been limited in practice due to lack of regulatory guidance [21] on what evidence should be available when validating the precision and reliability of the collected data. These data can be large in size, difficult to manage, and potentially meaningless without appropriate processing and analysis. (p.1…	Metadata, i.e., data that accompany and describe the primary data, can be utilized to better understand the context of the sensor data and can assist in data management, data sharing, and subsequent data analysis. (Abstract p.116-7) we here propose a metadata set that reflects regulatory guide lines and that can serve as a conceptual map to (1) inform researchers on the metadata they should colle…
Big data in status epilepticus	Baldassano SN, Hill CE, Shankar A, Bernabei J, Khankhanian P, Litt B.	Epilepsy Behav	2019	10.1016/j.yebeh.2019.106457	Neurology	Status Epilepticus	Big data, more specifically: EHRs, administrative databases (e.g., data collected for billing purposes), iEEG, multimodal ICU data, physiological data (e.g., heart rate, respiratory rate)	One goal is to use clinical records to stratify patients, both for prognostication and to identify patient groups that may benefit from particular interventions such as continuous EEG (cEEG) monitoring, surgery, or neuromodulation. In this way, personalized data mining algorithms can be used to optimize and individualize care. Secondly, extensive intracranial EEG (iEEG) datasets recorded using ne…		Epilepsy datasets are particularly challenging as they are generated in a wide range of settings using differing terminologies. However, while qEEG may significantly reduce review time by the clinician, sensitivity for seizure identification may be as low as 51–67% [96], limiting its clinical reliability.The improvement in classifier performance on prestructured data compared to free-form notes i…
Publicly available data and pediatric mental health: leveraging big data to answer big questions for children.	Blair, Lisa M.	Journal of Pediatric Health Care	2015	10.1016/j.pedhc.2015.08.001	Mental Health	Pediatrics	Publicly available big data	publicly available data share one major benefit: ease of access. Timeliness is another major benefit, particularly for longitudinal data that an individual researcher might spend years or decades collecting. With publicly available data, the time frame from hypothesis to evidence is shortened because the data are already collected, cleaned, coded, and de-identified. Codebooks, methodology documen…	Publicly available big data are especially well suited to answering questions about the mental health of children, because these rich data sets allow investigation of multiple influencing factors while strictly protecting the confidentiality of participants through deidentification. The currently available public data includes measures of cognition and survey data about school performance, social…	Because of the nature of big data, specialized statistical expertise is usually required to ensure that the appropriate methods and interpretations are used. Sample weights serve to control statistical bias associated with measuring a small subset of a larger population by adjusting the sample pool to more closely match the larger population on a number of characteristics (Solon, Haider, & Wooldr…	Measurement also may pose a challenge to researchers seeking to leverage big data. Specifically, because study designs are predetermined by others, the ‘‘ideal’’ measure of a construct or phenomenon may not have been used to generate the data. Researchers and clinicians attempting to answer clinical questions may have to familiarize themselves with unfamiliar tools and measures, or they may need …	For these reasons, collaboration with a statistician or methodologist who is familiar both with big data sets and sample weighting is highly recommended.
The Keeping on Track Study: Exploring the Activity Levels and Utilization of Healthcare Services of Acute Coronary Syndrome (ACS) Patients in the First 30-Days after Discharge from Hospital	Clark RA, Foote J, Versace VL, Brown A, Daniel M, Coffee NT, Marin TS, Kourbelis C, Arstall M, Ganesan A, Maddison R, Kelly J, Barry T, Keech W, Nicholls SJ; Health Translation SA Cardiac Rehabilitation Group.	Med Sci (Basel)	2019	10.3390/medsci7040061	Cardiology, acute coronary syndorme	Cardiology, Acute coronary syndrome	quantitative and digital data collection (GPS and GIS) and qualitative patient-reported experiences (satisfaction survey) and a discharge education recall questionnaire.	The use of wearable physical monitoring devices o_x000B_ers significant potential for researchers and clinicians working to promote or measure a patient’s activity levels. Activity tracking devices have the potential to e_x000B_ect physical activity behavior change, make a direct and real-time impact on self-management of physical activity and o_x000B_er clinicians real world assessments of their…	At the recruitment phase enthusiasm was high with only 10% of those approached declining to participate. This participant group reported highly satisfactory experiences with participating in the study. Satisfaction was measured on completion of follow-up at 30 days (87%) and 90 days (90%). All except one participant maintained (charged) the phones and ensured data transmission. Consequently, at c…	Missing spatial data was unable to be accounted as it relied upon adherence to the study protocol by participants.
Social determinants of health in mental health care and research: a case for greater inclusion	Deferio Joseph J., Scott Breitinger, Dhruv Khullar, Amit Sheth, Jyotishman Pathak	J Am Med Inform Assoc	2019	10.1093/jamia/ocz049	Mental Health		Data related to social determinants of health; EHR	richer contextual information; getting a more robust set regarding patient variables;iIdentification of social correlates of health outcomes				Based on the Spark data processing platform [21], data mining technology is used to preprocess the data with inconsistency, redundancy, incompleteness, noise and error; Since medical data has unbalancedness [22], namely the number ofthe patient population sample is far less than the number of samples ofhealthy people. Therefore, the stratified sampling technique is used to transform the unbalance…
Technology in Parkinson's disease: Challenges and opportunities	Espay AJ, Bonato P, Nahab FB, Maetzler W, Dean JM, Klucken J, Eskofier BM, Merola A, Horak F, Lang AE, Reilmann R, Giuffrida J, Nieuwboer A, Horne M, Little MA, Litvan I, Simuni T, Dorsey ER, Burack MA, Kubota K, Kamondi A, Godinho C, Daneault JF, Mitsi G, Krinke L, Hausdorff JM, Bloem BR, Papapetropoulos S; Movement Disorders Society Task Force on Technology.	Mov Disord	2016	10.1002/mds.26642	Neurology	Parkinson disease	Data from health technology (e.g., wearable devices)	Information enrichment; treatment optimization; Maximization of “ecological” validity; Monitoring; high resolution descriptions; improvement of quality of care; ersonalized medicine		Furthermore, devices developed by different manufacturers for the same purpose may not always yield the same result, raising questions about the validity of the mathematical algorithms that govern the data processing	Difficult to infer from the sensor data alone if slowness of movement (as detected using biomechanical sensors) can be used as a proxy of bradykinesia or is the result of fatigue or other factors related to the context in which a motor task is performed (eg, slow walking because of fear of falling. Most wearable systems developed to monitor individuals with PD are not compatible with one another.…	Here, clinical expertise is needed, for instance, to eliminate the “clinical noise” in the data analytical efforts. An important aim of TOMs is to improve on, rather than act as surrogates of, previously developed clinical scales. As these are developed, clinicians and regulatory agencies will need to consider that a new TOM that appears to provide clinically relevant measures of movement charact…
Neurocritical Care: Bench to Bedside (Eds. Claude Hemphill, Michael James) Integrating and Using Big Data in Neurocritical Care	Foreman B.	Neurotherapeutics	2020	10.1007/s13311-020-00846-1	Neurology	Neurology; Neurocritical care	ICU data comes from variety structured a of systems withmultiple standards, including data (Health Level Seven (HL7) clinical flowsheet data), semi-structured propriety-format sensor data such as EEG, and unstructured free-text clinician notes, as well as Digital Imaging and Communications in Medicine (DICOM) standard imaging and Logical Observation Identifiers Names and Codes (LOINC) standard la…	The critical care environment drives huge volumes of data, and clinicians are tasked with quickly processing this data and responding to it urgently. (Abstract) there are no widely adopted integrating methods for these data [7]. (p.594) Motiviation to use Neural networks: Neural networks may be more capable of handling the complexity of data generated in the ICU setting. For instance, neural netw…	For unstructured data such as free-text notes, natural language processing (NLP) is a tool that draws features from syntactical data based on specified rules. Features can then be generated directly from clinical documentation, potentially preserving the nuances of uncertainty and allowing for data that has no structured access point. NLP has been used primarily to enhance research and registry d…		Challenge to solve before data integration: Big Data in the neurocritical care unit requires rethinking of data storage infrastructures and the development of tools and analytics to drive advancements in the field. (p.593 Abstract) Barriers to its [big data] use at bedside include a lack of infrastructure development within the healthcare industry, lack of standardization of data inputs, and ulti…	[use] SQL databases use tables to store data, which include definitions about which data is stored where (p.594) Tools then must be developed for preprocessing, feature extraction, and statistical processing (Fig. 1). Preprocessing may refer to outlier detection algorithms that remove values of arterial pressure that are negative in value, complex algorithms designed to check data based on its re…
Smartphones and the Neuroscience of Mental Health	Gillan CM, Rutledge RB.	Annu Rev Neurosci	2021	10.1146/annurev-neuro-101220-014053	Mental Health	no specific subfield	smartphone-based data: text, speech, GPS data	need to collect longitudinal datasets from much larger and more diverse samples than is practical using traditional methods; smartphone-based assessments can be implemented in a convenient and timesaving fashion	overcoming problems of small sample and effect sizes, contextualization of effect sizes through concurrent measurement of between-subject variables and education or within-subject state variables		data sets with fewer participants than data points present challenges for robust analysis, and as smartphone-based data sets become larger, this problem can get worse	external validation becomes increasingly important
Invited Commentary on Stewart and Davis ' ‘Big data’ in mental health research—Current status and emerging possibilities'.	Hafferty, Jonathan D.; Smith, Daniel J.; McIntosh, Andrew M.	Social Psychiatry and Psychiatric Epidemiology: The International Journal for Research in Social and Genetic Epidemiology and Mental Health Services	2017	10.1007/s00127-016-1294-4	Mental Health		Big data	Collecting data in naturalistic clinical settings; possibility of analyzing rarer clinical conditions or subject areas in a more efficient way, use for prediction and personalized medicine, Better modelling of the ‘bio-psycho- social’ outcomes of psychiatric illness	A further advantage of this data is it often arises from naturalistic clinical settings, in terms of both clinical practice and patient health and comorbidity. Indeed, while often considered the ‘gold standard’ in medical research, RCTs do have important limitations, such as overly-strict exclusion criteria. Routine clinical data sets can, therefore, be complementary to RCT data, while also makin…	including that clinical administrative data are generally not collected, curated, or formatted in a manner optimised for research, and the inherent sensitivity of the data in terms of personal privacy. In healthcare big data, the benefits offered by the cloud in increased power and accessibility, and reduced cost, must be weighed against concerns over data ownership, encryption, and unauthorized …	An important, and arguably under-researched, aspect of healthcare ‘big data’ is ethics and governance. Privacy, informed consent, data stewardship, and the long-term ownership of data by academic and commercial entities are becoming ever more pertinent issues as the pace of data accumulation increases. Data collected from individuals with psychiatric illness may come with additional consent and p…	psychiatry requires greater involvement of the research community in shaping the structure and content of clinical data platforms, rather than just being their passive recipients. genetics. The adoption of shared standards in data management, data governance, and data security would facilitate joint, comparative, and replicative big data studies between centres (for a summary of the current initi…
Testing Suicide Risk Prediction Algorithms Using Phone Measurements With Patients in Acute Mental Health Settings: Feasibility Study	Haines-Delmont A, Chahal G, Bruen AJ, Wall A, Khan CT, Sadashiv R, Fearnley D.	JMIR Mhealth Uhealth	2020	10.2196/15901	Mental Health	suicide risk research	Facebook, user data, clinician ratings, passive sensor data	Although standardized clinical tools can help to classify factors that contribute to suicide risk and understand biological markers related to suicide (trait analyses), computer science and machine learning can provide additional and timely tools to understand linguistic markers of suicide thought (state analyses). New statistical methods have been proposed and tested to achieve more accurate pre…	we managed to build an algorithm that predicts suicidal risk at a rate significantly better than the baseline of guessing the simple majority that were collected directly from smartphone interactions Although smartphones provide us with opportunities to gather data on real-time dynamic risk factors for suicidal behavior, which would be almost impossible to monitor on discharge (from mental health…	only a small proportion of inpatients had access to a smartphone. further, the study app was configured to operate only with iOS products, that is, an iPhone	it is uncertain if service users in the community would accept to have their suicidal trajectory data shared for this purpose or how mental health services would be able to bridge the gap	for high accuracy in short-term risk prediction a broad variety of data needs to collected
Big data from electronic health records for early and late translational cardiovascular research: challenges and potential	Hemingway H, Asselbergs FW, Danesh J, Dobson R, Maniadakis N, Maggioni A, van Thiel GJM, Cronin M, Brobert G, Vardas P, Anker SD, Grobbee DE, Denaxas S; Innovative Medicines Initiative 2nd programme, Big Data for Better Outcomes, BigData@Heart Consortium of 20 academic and industry partners including ESC.	Eur Heart J	2018	10.1093/eurheartj/ehx487	Cardiology	No specific subfield	EHRs (structured and unstructured data); biobanks, genomic consortia; any researcher-generated data (e.g., omics data)	Str. and unstr. data can be put together using data linkage and integration techniques into a fine-grained longitudinal picture of health over time (the ‘human phenome sequence’). Such diverse data may offer higher resolution of clinically relevant clusters of diseases, causes, and classifiers.	The fact that wearables are "always on" provides richer insight into the behaviour and a lot of data.		1. untrained clincians 2. privacy and data sharing 3. missing data	1. introduce specializations related to informatics in the clinical setting 2. broad consent models 3. "collect once, use many times"
Digital Biomarkers of Social Anxiety Severity: Digital Phenotyping Using Passive Smartphone Sensors	Jacobson NC, Summers B, Wilhelm S.	J Med Internet Res	2020	10.2196/16875	Mental Health	social anxiety, digital phenotyping	structured data: Social Interaction Anxiety Scale; Depression, Anxiety, and Stress Scale; Positive Affect Negative Affect Schedule unstructured data: Accelerometer data, incoming and outgoing calls and text timestamps	Despite the promise of offering a better understanding of the contextual factors related to SAD symptom severity, most of the current research to date has not examined whether symptom severity can be accurately predicted utilizing only sensor data (ie, without additional severity indicators). This investigation is necessary to assess the utility of smartphone sensor data as a stand-alone predicti…	Our data indicated that calls, texts, and movement patterns captured by individuals’ smartphones over 2 weeks provided sufficient information to predict severity of SAD symptoms + dicriminate between depression, negative affect , or positive affect. These data suggest that simple behavioral information that is already passively collected for most individuals in the United States may represent a h…	Interpretation issues: passive data collection does not allow us to quantify the type of social contact that someone may be experiencing	not mentionned	not mentionned
Computer-Aided Diagnosis and Clinical Trials of Cardiovascular Diseases Based on Artificial Intelligence Technologies for Risk-Early Warning Model	Li B, Ding S, Song G, Li J, Zhang Q.	J Med Syst	2019	10.1007/s10916-019-1346-x.	Cardiology		Medical big data, medical diagnostic records	Disease diagnostic, early-risk prediction		Data are rarely standardized, often come from unvalidated instruments and questionnaires, and typically facilitate community-level analyses over individual-level investigation. In the rare cases that such data are collected, care providers often do not use validated instruments raising concerns about data interpretation and secondary use.24 As a result, individual-level SDOH data collection typic…	The integration of advanced analytical tools that incorporate SDOH within EHRs raises the issue of interoperability with internal and external systems as a key challenge. EHRs typically lack robust data interoperability and information exchange capabilities and suffer from information redundancy due to data silos. As the amount of SDOH data increases, so too will the work needed to track concept …	The availability of PRAPARE and other similar tools, such as HealthBegins and WellRx, are necessary first steps, but they have yet to be implemented broadly across EHR systems or integrated into clinical workflows in facilities caring for patients with mental health disorders (such as primary care settings, specialty and mental health clinics, and free-standing acute mental health facilities)
Architecture of the Japan Ischemic Heart Disease Multimodal Prospective Data Acquisition for Precision Treatment (J-IMPACT) System	Matoba T, Kohro T, Fujita H, Nakayama M, Kiyosue A, Miyamoto Y, Nishimura K, Hashimoto H, Antoku Y, Nakashima N, Ohe K, Ogawa H, Tsutsui H, Nagai R.	Int Heart J	2019	10.1536/ihj.18-113	Cardiology	Cardiology, ischemic heart disease, initiative for precision treatment	SSMIX2 standard storage obtains most medical records, such as patient information, diagnoses, prescription records, and laboratory data, and is standardized to comply with the international organization for standardization (ISO) IS 27931, for HIS regardless of their developers. SS-MIX2 extended storage obtains virtually any additional electronic data regarding medical activity and procedures as t…	However, current HIS are usually intended for general clinical use and are not suitable to extract digital medical records for clinical research, including registry type study. Particularly, medical images, movies, and procedure reports are usually securely stored in specialized data storage separate from HIS. This situation prompted us to develop an electrical digital data capture system to acqu…	The J-IMPACT system enables a one-stop, semi-automatic acquisition of multimodal electronic data, which will readily be registered to MCDRS server on-the-fly, excluding a possibility of errors while manually inputting to conventional EDC systems.		Only referring to the integration of both str. and unstr. data from different sources.
Unobtrusive detection of Parkinson's disease from multi-modal and in-the-wild sensor data using deep learning techniques	Papadopoulos A, Iakovakis D, Klingelhoefer L, Bostantjopoulou S, Chaudhuri KR, Kyritsis K, Hadjidimitriou S, Charisis V, Hadjileontiadis LJ, Delopoulos A.	Sci Rep	2020	10.1038/s41598-020-78418-8	Neurology	Neurology; Parkinson’s diseases	accelerometer data, Keystroke timing data, metadata (e.g. age, gender, PD status)	the initial motor symptoms are usually very subtle and, as a result, patients seek medical assistance only when their condition has substantially deteriorated; thus, missing the opportunity for an improved clinical outcome. This situation highlights the need for accessible tools that can screen for early motor PD symptoms and alert individuals to act accordingly. (Abstract)	we proposed an end-to-end trainable deep learning framework, consisting of independent building blocks, such as feature extractors and attention pooling modules, that outputs binary predictions for tremor, FMI and PD. (p.6) Aside from its performance, one of the most attractive properties of the proposed framework is its extend ability, i.e., due to its modular structure, it is rather straightfor…	-	A) A limitation of our approach is that, in its current form, it may lead to false positive PD predictions even in cases where the symptom detection is performed correctly. In fact, it is natural for a healthy subject to exhibit some symptom from the PD motor symptomatology. For example, tremor is associated with many other conditions and in some cases it may not even be caused by pathological fa…	A) As far as we can see, there are two main directions of improvement, that could alleviate the impact of this issue: a) acquisition of new training examples that cover these specific cases, and b) incorporation of additional data modalities, so that any predictions are based on a more complete view of the subject. As these directions are complementary to each other, they can be pursued independe…
Enhancing Prediction Models for One-Year Mortality in Patients with Acute Myocardial Infarction and Post Myocardial Infarction Syndrome	Payrovnaziri SN, Barrett LA, Bis D, Bian J, He Z.	Stud Health Technol Inform	2019	10.3233/SHTI190226	Cardiology	Cardiology, Acute myocardial infarction, post myocardial infarction syndrome	Str: demographic and admission data (from EHR), Unstr: free text from discharge summary	Large EHR data enables one to 1) build more precise prediction models considering a wider range of patient characteristics; 2) be able to refresh these prediction models more frequently with less engineering efforts; and 3) improve the quality of these prediction models with fewer issues such as the common generalization problem. ; They have previously conducted a similar prediction study with st…	The dimension of data in our previous study was 79 considering only features from structured data. Adding features derived from unstructured data increased the total number of features and increased the input data dimension up to 279. The combination of admission information with free-text features produced an accuracy of 88.25% in the deep learning model; while, the accuracy of the deep learning…
Cohort profile of the South London and Maudsley NHS Foundation Trust Biomedical Research Centre (SLaM BRC) Case Register: current status and recent enhancement of an Electronic Mental Health Record-derived data resource	Perera G, Broadbent M, Callard F, Chang CK, Downs J, Dutta R, Fernandes A, Hayes RD, Henderson M, Jackson R, Jewell A, Kadra G, Little R, Pritchard M, Shetty H, Tulloch A, Stewart R.	BMJ Open	2016	10.1136/bmjopen-2015-008721.	Mental Health		EHRs, diverse databases	Information enrichment; novel investigations, detection of patterns in patient care and treatment habits, enhancement of research question		there may be limits in the usefulness of NLP in EHR-sourced data resources, because of the high degree of variability in clinical text. Cohort studies using such data resources therefore need to take into account not only what data are available from the record but also the time periods within which they are available. These time periods also need to be carefully considered in relation to the que…	A key challenge inherent with all use of healthcare data is data protection, and it is important to develop anonymised data resources in a way that is acceptable to the general public, and to the patients whose personal and often highly sensitive information forms the database. Such challenges incorporate not only a case register’s data themselves but also procedures around data linkage where use…	Regardless of the volume of data available, it is important to bear in mind their provenance (ie, highly dependent on what information a clinical staff member records or not); research applications need to be tailored with this in mind. On final approval, SLaM BRC researchers will submit their data extract request to CDLS, either using CRIS to identify a discrete list of client pseudonyms for the…
Medical Device Connectivity Challenges Outline the Technical Requirements and Standards For Promoting Big Data Research and Personalized Medicine in Neurocritical Care	Rodriguez A, Smielewski P, Rosenthal E, Moberg D.	Mil Med	2018	10.1093/milmed/usx146	Neurology	Neurocritical care	Genomic, imaging, physiological, and phenotypic information (e.g., EEG), pre- and post- psychometric testing, EHR	The purpose of this manuscript is to identify the major pain points of data collection and management as experienced during large neurocritical care observational and interventional clinical trials, in order to raise awareness both in the scientific/clinical community and in the funding agencies.		No standard or clinical data elements were available for the annotation of contextual clinical events Infrastructure: The electronic medical record system versions in practice did not enable collection of full-resolution waveforms from data sources in neurocritical care units. The cost (time and resources) for successful data collection was often underestimated.	Data collection and integration in large multi-center research studies, however, have historically proven to be a more difficult and expensive task than anticipated. Multi-modality monitoring data and other contextual clinical information are provided by a variety of sources and their formats can vary widely between different sites, for example, because of different source devices, different elec…	standards to guide measurement nomenclature, annotation terminology, and archive format are recognized as a high priority and would facilitate the collection, curation, and sharing of comprehensive and rich data sets. The next goal is the release of recommendations aimed at investigators planning clinical trials and funding agencies, in order to raise awareness about the core importance of proper…
Predicting Future Cardiovascular Events in Patients With Peripheral Artery Disease Using Electronic Health Record Data	Ross EG, Jung K, Dudley JT, Li L, Leeper NJ, Shah NH.	Circ Cardiovasc Qual Outcomes	2019	10.1161/CIRCOUTCOMES.118.004741	Cardiology	Cardiology, periphery artery disease	Data included International Classificatio of Diseases, Ninth Revision (ICD-9) codes, Current Procedural Terminology codes, lab test values, prescription medications, vital signs, and unstructured clinical notes	However, as Goldstein et al6 report in a meta-anal ysis of EHR-based risk-stratification models, researchers often do not take full advantage of the diversity of data available in the EHR. This limitation in data usage may unduly limit the accuracy of predictive mod els, especially where complex nonlinear interactions are involved, even if the models are developed using data from thousands of pat…	We found that unstructured text and coded data added significantly to model performance. Removal of text data resulted in a drop in AUC from 0.81 to 0.78, P=0.002. ; Thus, an advantage to using EHR data for risk prediction is that such models can be fine-tuned to local populations or more specifi disease states and risk stratification can be automated. ; Thus, an advantage to using EHR data for r…	Another consideration is that we elected to define PAD and MACCE using diagnosis codes and term mentions because in our validation of this technique, we achieve an average specificit of 98% and precision of 90% across different cardio vascular disease states. This methodology represents a more easily deployable solution to cohort building than natural language techniques, although there may be lo…
Big data analytics to improve cardiovascular care: promise and challenges	Rumsfeld JS, Joynt KE, Maddox TM.	Nat Rev Cardiol	2016	10.1038/nrcardio.2016.42	Cardiology	No specific subfield	Big data in general	the promise of BDA lies in the insights generated from these databases and analyses, which have the power to inform and improve health-care delivery and patient outcomes. This improvement is accomplished through BDA applications, or tools, such as predictive models of health-care outcomes, business intelligence outputs, or other reports relevant to health-care operations or quality. The potential…	patients41. By evaluating large amounts of diverse data, such as electronic health record, imaging, and ‘omics’ data, BDA might reveal distinct disease phenotypes that can indicate differential therapies. Initial studies on ‘phenomapping’, or defining distinct groups of patients, utilizing BDA methods such as machine learning and natural language processing are promising42,43. Medical treatment h…	documents48. Although BDA can support quality measurement, caution should be taken in the use of electronic health record data to estimate performance measures, because BDA has the potential to misrepresent actual clinical performance49 practice. As such, little direct evidence so far demonstrates that BDA can or will improve cardiovascular care and outcomes. --> need for more research MEthodolog…	BDA tools will require clinical integration to be successful. Unfortunately, this aspect is largely overlooked in the current literature70. BDA tools face the same implementation challenges as other health-care quality interventions, and will require the same skill sets and resources (for example, quality improvement, systems engineering, informatics, and information technology support) to be int…	Importantly, when BDA are applied to higher-quality clinical data, the results can be more valid, stable, and clinically useful41,42
Telemonitoring Parkinson's disease using machine learning by combining tremor and voice analysis	Sajal MSR, Ehsan MT, Vaidyanathan R, Wang S, Aziz T, Mamun KAA.	Brain Inform	2020	10.1186/s40708-020-00113-1	Neurology	Neurology; Parkinson’s diseases	rest tremor and vowel phonation data acquired by smartphones with built-in accelerometer and voice recorder sensors (Abstract)	due to insufficient resources and awareness in underdeveloped countries, proper and timely PD detection is highly challenged. Besides, all PD patients’ symptoms are neither the same nor they all become pronounced at the same stage of the illness. Therefore this work aims to combine more than one symptom (rest tremor and voice degradation) by collecting data remotely using smartphones and detect P…	The proposed system can detect PD using a cloud-based system for computation, data preserving, and regular monitoring of voice and tremor samples captured by smartphones. Thus, this system can be a solution for healthcare authorities to ensure the older population’s accessibility to a better medical diagnosis system in the developing countries, especially in the pandemic situation like COVID-19, …	The inaccuracy in the detection of PD might have some possible reasons that include the variability in the severity of PD across patients [not related to unstructured data!], the sensor’s intrinsic uncertainty, and the fact that some patients may consciously or subconsciously suppress their tremors during the experiment [not related to unstructured data!]. (p.10)	the accuracy degrades for 5-level classification since the difference between UPDRS [Unified PD Rating Scale] levels 1 and 2 and UPDRS levels 3 and 4 is very subtle. (p.9) Outliers could be a challenging issue when this system is implemented practically for two reasons. Firstly, untrained professionals could collect the data to send to the cloud system while a trained neurologist might assess the…	In previous studies, [37] and [38], PD tremor is considered and reported as a single frequency signal, and the fundamental frequency ranges between 4 to 12 Hz. However, the results in [30] showed that PD tremor consists of several harmonics. Therefore the classification accuracy might be improved by incorporating the third stage detailed signal into consideration. (p.10; not of interest bcs nothi…
Big data in mental health research—Do the ns justify the means? Using large data-sets of electronic health records for mental health research.	Schofield, Peter	BJPsych Bulletin	2017	10.1192/pb.bp.116.055053	Mental Health		EHRs, data from other databases (e.g., hospital episode statistics, educational data)	Information enrichment: data about hard- to-reach groups, new relations between clinical outcomes and other factors	CRIS has proved particularly useful for research into mortality outcomes for people with severe mental illness,7,8 hard-to-reach groups such as homeless people9,10 and, more recently, services for people in the early stages of psychosis.11 Because of the scale of longitudinal data collected, registerbased studies using data such as these have proved particularly useful for aetiological research i…	What we gain through the sheer volume of data and breadth of coverage could be offset by ill-informed analysis and interpretation that fails to account for the limitations of the data. One fundamental limitation is that almost all examples of what we think of as big data are collected for purposes other than research. Health records, just like any bureaucratic product, are shaped by administrativ…	Admittedly, complex data of this kind can be difficult to analyse, but it also presents an ever-increasing number of choices about how the analysis could be conducted. We might use different diagnostic categories, we could follow our sample over different time periods and look at a variety of different subgroups. We might use different statistical methods for the same analysis and we could also a…	What is required, argues Gelman, is greater transparency so that we are able to retrace the steps made in the analysis to assess for ourselves the significance of findings.
Translational Informatics for Parkinson's Disease: from Big Biomedical Data to Small Actionable Alterations	Shen B, Lin Y, Bi C, Zhou S, Bai Z, Zheng G, Zhou J.	Genomics Proteomics Bioinformatics	2019	10.1016/j.gpb.2018.10.007	Neurology	Neurology; Parkinson’s diseases	The data formats vary and include strings for genetic data, images for PD brain structures, unstructured or semistructured formats with real values, text for electronic health record (EHR), and time series data for physiological signals. (p.416) Big PD biomedical data are diverse and could include the following data types. (1) The first one is different omics data, such as [...] (2) The second is…	The identification of actionable key players and alterations from the considerably large, noisy and diverse unstructured big data is the goal for translational informatics studies. In this review, we mainly discuss the value of PD big data mining, as well as the challenges and perspectives for the translation of PD big data to valuable biomarker discovery and risk factor screening for the future …			The challenges for PD data integration could include the following three aspects. (p.423) Challenge 1: diversity, standardization, and sharing of big PD biomedical data. (p.423) Challenge 2: databases for big PD biomedical data and knowledge. (p.423) Challenge 3: cross-level and dynamic integration of PD biomedical data. (p.424) --> for more details see pages 423-4. Each challenge is described Th…	By addressing the three challenges to PD data integration described above, translational informatics for PD studies will have considerable opportunities for scientific discovery and healthcare applications. (p.427)
Big Health Data and Cardiovascular Diseases: A Challenge for Research, an Opportunity for Clinical Care	Silverio A, Cavallo P, De Rosa R, Galasso G.	Front Med (Lausanne)	2019	10.3389/fmed.2019.00036	Cardiology	No specific subfield	Big data in general	However,many unstructured informations may be helpful to assemble a holistic view of a patient, including social and environmental factors potentially influencing health ; Data on heart failure patients undergoing remote monitoring after cardiac resynchronization therapy are also collected and may help to modify disease progression and improve survival. Due to the nature of remote monitoring, dat…	Additional informations can be received directly from the patients (e.g., health and biometric data from wearable technologies such as heart rate, blood pressure, calories burned, steps walked and time spent exercising) (25), from reports (e.g., health surveys on lifestyle and drug compliance to long-term anti-hypertensive or anti-lipidemic therapy), social media (blogs, tweets, Facebook posting)…		Most of the Database Management Systems through interchange and translation mechanism allow to overcome the barriers of the past related to the variety of incompatible data formats, non-aligned data, and inconsistent data semantics (15). The technical obstacles in linking such variety of informations is one of the main challenge of big data analytics (22, 23). For example, the absence of a unique…
Precompetitive Consensus Building to Facilitate the Use of Digital Health Technologies to Support Parkinson Disease Drug Development through Regulatory Science	Stephenson D, Alexander R, Aggarwal V, Badawy R, Bain L, Bhatnagar R, Bloem BR, Boroojerdi B, Burton J, Cedarbaum JM, Cosman J, Dexter DT, Dockendorf M, Dorsey ER, Dowling AV, Evers LJW, Fisher K, Frasier M, Garcia-Gancedo L, Goldsack JC, Hill D, Hitchcock J, Hu MT, Lawton MP, Lee SJ, Lindemann M, Marek K, Mehrotra N, Meinders MJ, Minchik M, Oliva L, Romero K, Roussos G, Rubens R, Sadar S, Scheer…	Digit Biomark	2020	10.1159/000512500	Neurology	Neurology; Parkinson’s diseases	Data from: Digital health technologies (DHT), such as smart phone applications, wearable sensors, and digital diaries (Abstract) In this review, DHT are defined as a broad range of technologies that capture information about motor presentation and mobility, pathophysiological manifestations, cognitive decline, sleep, social interactions and behaviors, activity, speech, and mood (Table 1). (p.32)	Innovative tools are urgently needed to accelerate the evaluation and subsequent approval of novel treatments that may slow, halt, or reverse the relentless progression of Parkinson disease (PD). (Abstract) Digital technologies are now being implemented in PD observational studies and clinical trials in both a passive and an active manner, and there is an opportunity to enable improved assessment…	The Parkinson’s Progression Markers Initiative (PPMI) is a multicenter longitudinal study designed to comprehensively assess PD progression, clinical outcomes, imaging, digital, genetic, and biological biomarkers. [...] The impact of the PPMI continues to expand, and much of the success can be attributed to agreement on consensus data standardization and open sharing of all patient-level data wit…	-	Digital health technologies (DHT), such as smart phone applications, wearable sensors, and digital diaries, have the potential to address many of these gaps by enabling the objective, remote, and frequent measurement of PD signs and symptoms in natural living environments. [...] In order for these technologies to be adopted in drug development studies, a regulatory-aligned consensus on best pract…	A growing number of collaborativeinitiatives are being launched to identify effective ways to advance the use of DHT in PD clinical trials. (Abstract) Precompetitive collaborations and public-private partnerships have been proposed as efficient means to address gaps in the development of DHT and their optimal use in drug development. (p.33) Recommendations for evaluation and performance of a DHT …
Predicting Emotional States Using Behavioral Markers Derived From Passively Sensed Data: Data-Driven Machine Learning Approach	Sükei E, Norbury A, Perez-Rodriguez MM, Olmos PM, Artés A.	JMIR Mhealth Uhealth	2021	10.2196/24465	Mental Health		Daily summary values of 6 passively collected observations were considered: step count, distance traveled, hours of sleep, hours of phone use, time spent at home, and the number of locations visited.	Ecological momentary assessment (EMA) is, despite its advantages dependend individual’s current level of insight and willingness and ability to interact with the EMA platform. Many psychiatric disorders cause b ehavioral changes that may decrease an individual’s likelihood of interacting with an EMA tool (demotivation, apathy, and survey fatigue), causing missing data, not at random. Therefore, i…	not mentioned	not mentioned	Some of the patient sequences had large chunks of consecutively missing observations, which could be because of sensor or software errors or the patients not using their devices for an extensive amount of time.	This study is an initial step toward developing more robust and informed models for predicting emotional states from passively sensed data. It presents a sound basis for further exploration by proposing a solution to missing and sparsely labeled data, allowing the future focus to be directed toward developing more advanced models.
Multi-Layer Picture of Neurodegenerative Diseases: Lessons from the Use of Big Data through Artificial Intelligence	Termine A, Fabrizio C, Strafella C, Caputo V, Petrosini L, Caltagirone C, Giardina E, Cascella R.	J Pers Med	2021	10.3390/jpm11040280	Neurology	Neurology; neurodegenerative disorders such as Alzheimer’s and Parkinson’s diseases	multi-omics, neuroimaging, and electronic health records / clinical data	the integration of multi-omics, neuroimaging, and electronic health records data can be exploited using deep learning methods to provide the most accurate representation of patients possible. Deep learning allows researchers to find multi-modal biomarkers to develop more effective and personalized treatments, early diagnosis tools, as well as useful information for drug discovering and repurposin…	Clinical records investigation: 1) ML and DL techniques have been exploited to support clinical expertise analyzing handwritings, voice recordings, and movement registrations. Handwriting deteriorationis one of the most typical clinical hallmarks of PD and the identification of distinctive handwriting features can help to build a predictive model for PD classification. (more details p.6) 2) Class…	Another relevant issue in this field is the reproducibility of other studies and the implementation of other’s AImodels. This is due to the lack of open-source implementations provided by authors andthe difficulty of re-implementing a network in a different library. (p.15; not sure this is actually relevant for our review!!)	Healthcare data are typically dispersed across various medical systems located at multiple sites and many of these systems are not interconnected, constraining the data into isolated silos and contributing to the increase in the expenses of institutions. (p.10) only DL has the potential to integrate the entire medical record, including physicians’ free-text notes. (p.14) However, developing a com…	Fast Health Interoperability Resources (FHIR) is a modern healthcare data format and exchange standards widely used to encode EHRs data [46]. FHIR implements an application programming interface with HTTP-based RESTful protocols and enables interoperable communication and information sharing be tween various healthcare systems, enabling their integration with mobile devices and cloud platforms. F…
Quadruple Decision Making for Parkinson's Disease Patients: Combining Expert Opinion, Patient Preferences, Scientific Evidence, and Big Data Approaches to Reach Precision Medicine	van den Heuvel L, Dorsey RR, Prainsack B, Post B, Stiggelbout AM, Meinders MJ, Bloem BR.	J Parkinsons Dis	2020	10.3233/JPD-191712	Neurology	Neurology; Parkinson’s diseases	best available scientific evidence, professional expertise, and the personal needs and preferences of patients big data approaches: Many types of data are generally reckoned to fall under the umbrella term of ‘big data’, including observational study data, large datasets, technology-generated outcomes (e.g., from wearable sensors), passively collected data, and machine-learning generated algorith…	Fine grained patient profiles created from big data have the potential to aid in identifying therapeutic approaches that will be most effective given each patient’s individual characteristics, which is particularly important for a disorder characterized by such tremendous interindividual variability as Parkinson’s disease. (Abstract) More specifically, big data approaches have the potential to br…	Knowledge enrichment reported from other studies than this paper: * great potential offered by medical claims databases, which contain a rich set of longitudinal data collected for large-scale and real life PD populations [32]. Such medical claims data have, for example, proven to be effective in demon strating the value of specialized physiotherapy for PD patients [33]. Alternative large dataset…	All three sources [best available scientific evidence, professional expertise, and the personal needs and preferences of patients] have clear value but also share several important limitations, mainly regarding subjectivity, generalizability and variability. (Abstract) From here on, these are limitations/gaps to "shared decision making", not necessarily related to unstructured data, but rather to…	-	[All three sources [best available scientific evidence, professional expertise, and the personal needs and preferences of patients] have clear value but also share several important limitations, mainly regarding subjectivity, generalizability and variability.] Big data, including data from real-life unselected Parkinson populations, can help to bridge this information gap. (Abstract) Analyses of …
